# Supplementary material for: Asymmetric passivation of edges: a route to make magnetic graphene nanoribbons
Source: Royal Society of Chemistry journal article supplement (doi:10.1039/c7ra03461j), 2017-01-01
Supplement: c7ra03461j1.pdf [file c7ra03461j1.pdf]

# **Supporting information for Asymmetric passivation of edges: a route to make magnetic graphene nanoribbon**

Wen-cai Yi,<sup>ab</sup> Wei Liu,<sup>cd</sup> Lei Zhao,<sup>b</sup> Rashed Islam,<sup>b</sup> Mao-sheng Miao<sup>\*bc</sup> and Jing-yao Liu<sup>\*a</sup>

<sup>a</sup> *Laboratory of Theoretical and Computational Chemistry, Institute of Theoretical Chemistry, Jilin University, Changchun 130023, People's Republic of China. E-mail: lyy121@jlu.edu.cn;*

<sup>b</sup> *Department of Chemistry & Biochemistry, California State University, Northridge, CA, 91330, USA. E-mail: mmiao@csun.edu*

<sup>c</sup> *Beijing Computational Science Research Center, Beijing, 100094, P. R. China*

<sup>d</sup> *Department of Physics and Astronomy, University of California, Irvine, CA, 92697, USA*

Table S1: The value of band gap of the studied ZGNRs (at PBE level)

| Name          | 8-ZGNR | 8-ZGNR-1/8 | 8-ZGNR-4/8 | 8-ZGNR-8/8 |
|---------------|--------|------------|------------|------------|
| Band gap (eV) | 0.67   | 0.26       | 0.06       | 0.09       |

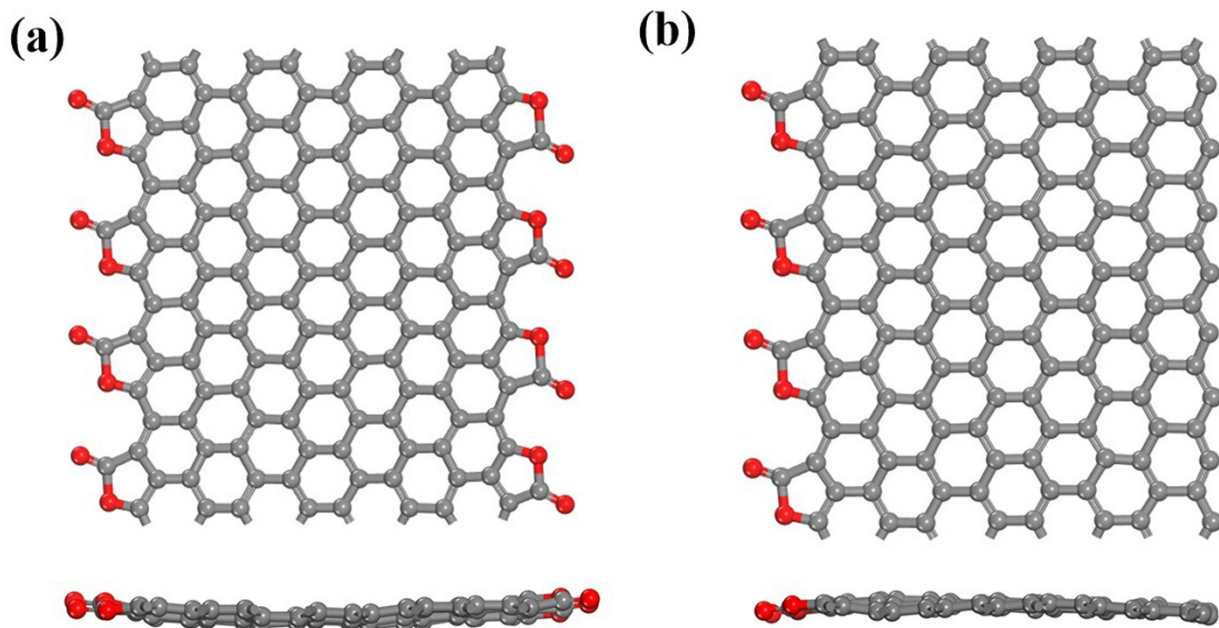

Fig. S1: The top and side view of the final configurations for each molecular dynamics simulation at 400K of (a) 8-ZGNR-8/8 and (b) 8-ZGNR-4/8, respectively.

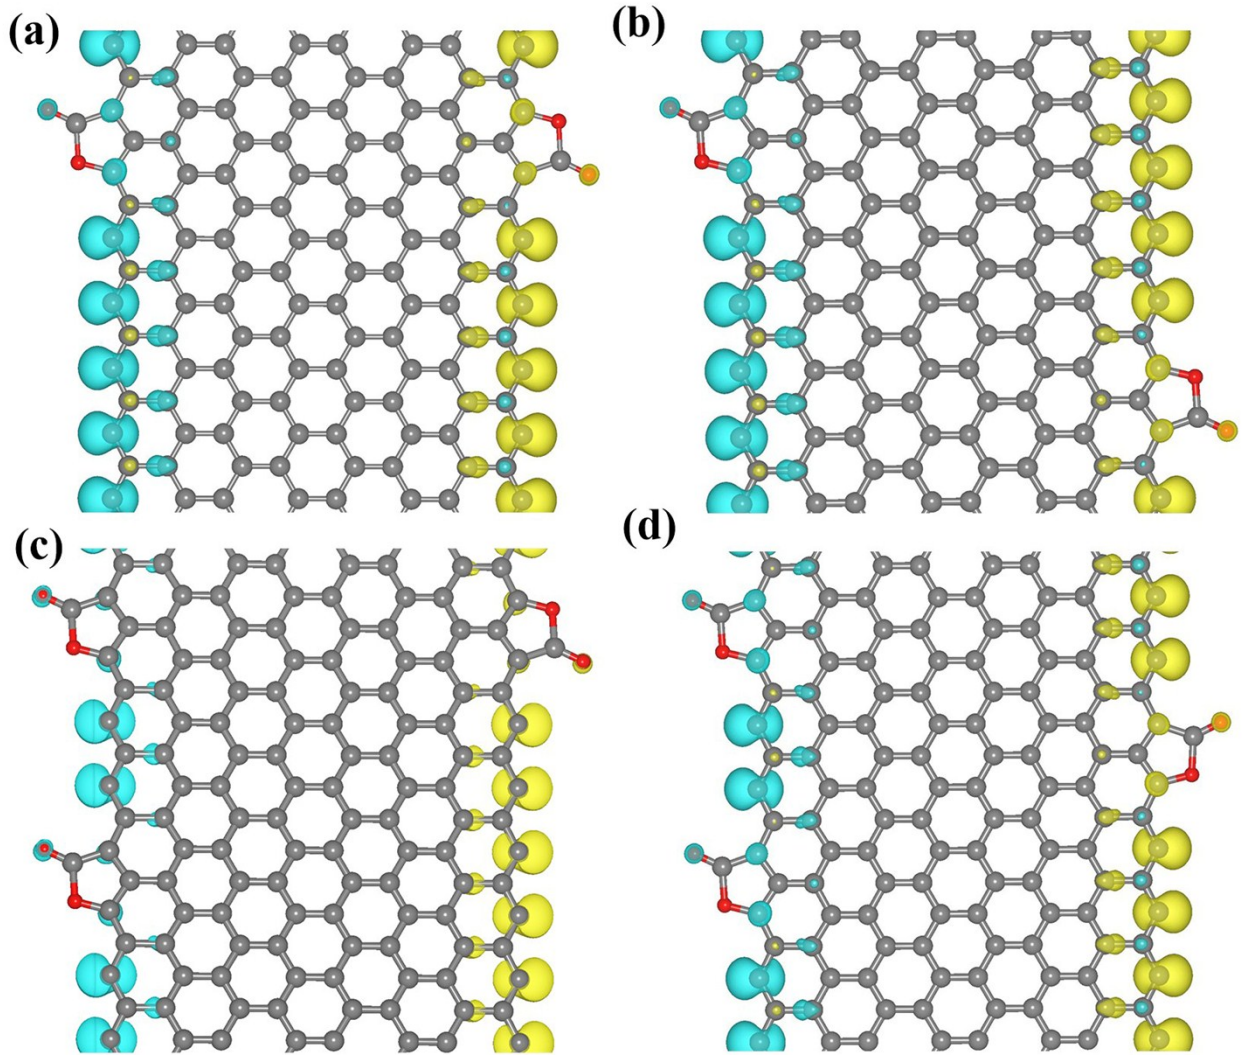

Fig. S2: The spin-polarized electron density of (a) two  $\text{CO}_2$  molecules adsorbed on two edges of 8-ZGNR, AFM,  $m= 0.00\mu_{\text{B}}$ ; (b) two  $\text{CO}_2$  molecules adsorbed on two different position of edges of 8-ZGNR, AFM,  $m= 0.00\mu_{\text{B}}$ ; (c) three  $\text{CO}_2$  molecules adsorbed on two edges of 8-ZGNR, AFM,  $m= 2.00\mu_{\text{B}}$ ; (d) three  $\text{CO}_2$  molecules adsorbed on three different position of edges 8-ZGNR, AFM,  $m= 2.00\mu_{\text{B}}$ ; blue was spin up and yellow was spin down. The isosurface value is set to  $1.00 \times 10^{-2} \text{ \AA}^{-3}$ .

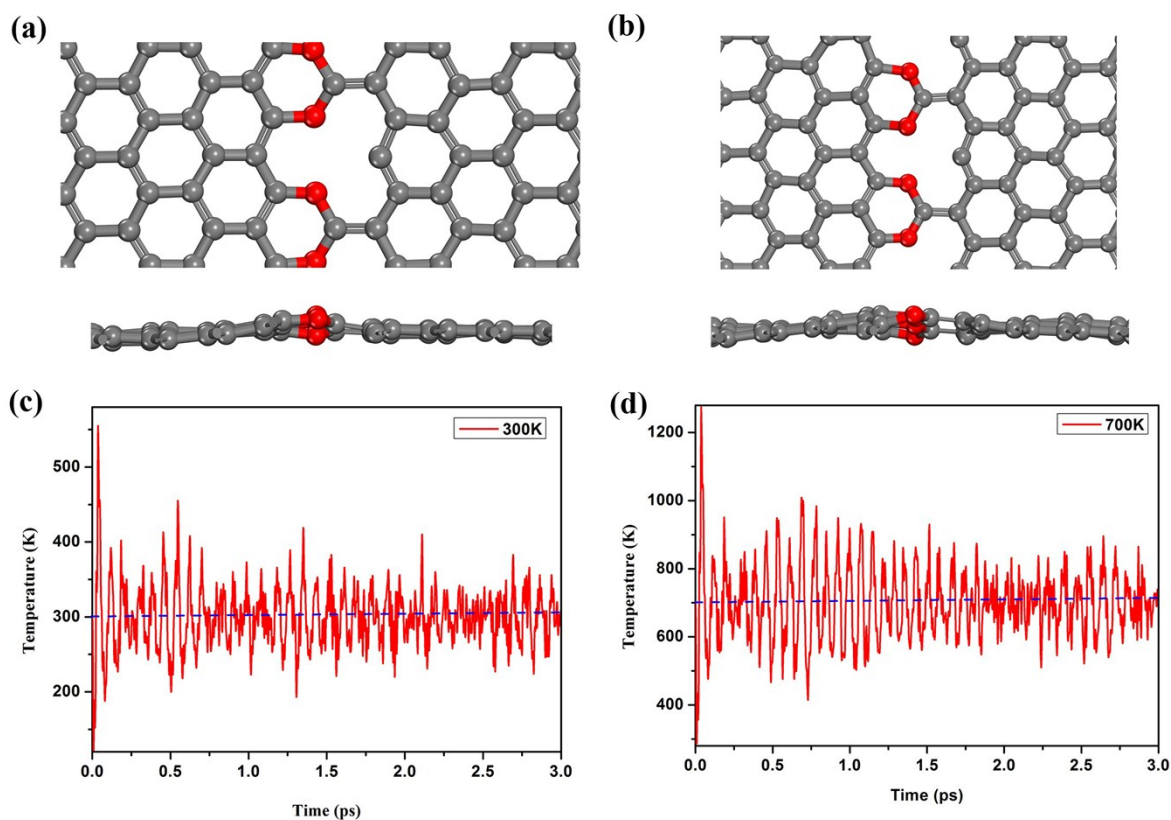

Fig. S3: Snapshots of the final configurations for each molecular dynamics simulation under (a) 300 and (b) 700 K (top and side views); The fluctuations of temperature as a function of the molecular dynamic simulation step at (c) 300K and (d) 700 K, respectively.
